# Supplementary material
Source: publisher site journal article supplement (https://www.spandidos-publications.com/3252/downloadSupplementary)

Figure S1. Representative flow cytometry plots showing the uptake of CFPE-labeled liposomes by bEnd.3 and C6 cells. CFPE, 1,2-dioleoyl-sn-glycero-3-phosphoethanolamine-N-carboxyfluorescein; L, conventional liposome; cRGDyK-L, cRGDyK-modified liposome.

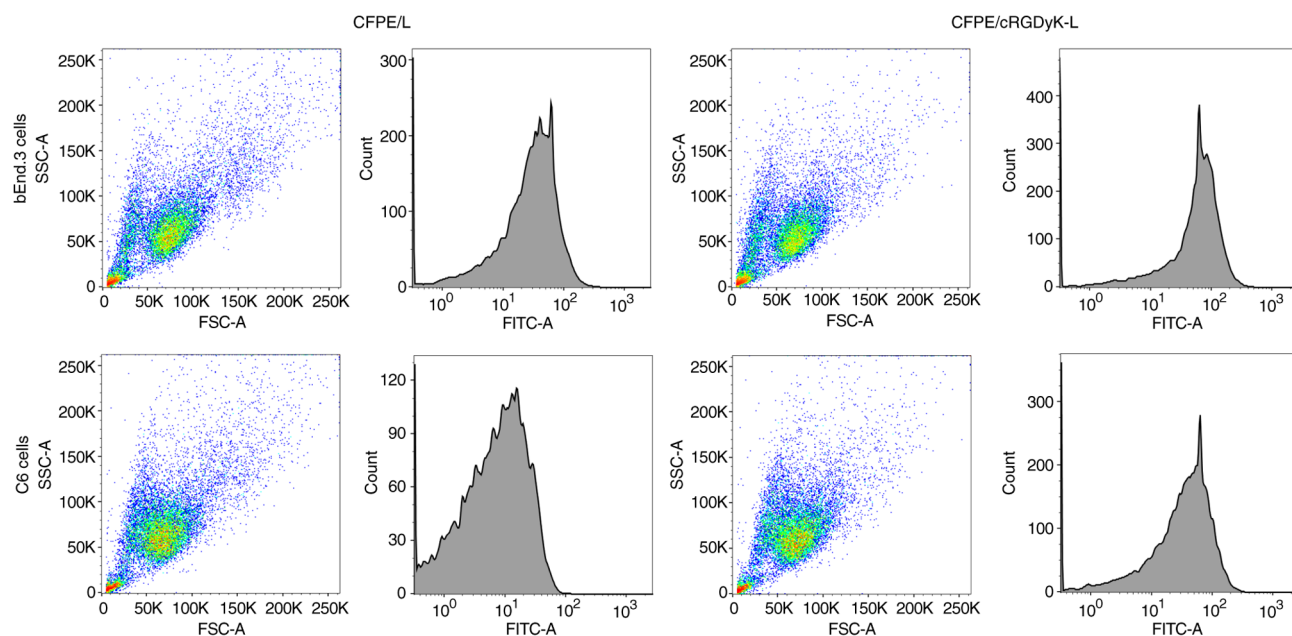

Figure S2. Representative flow cytometry plots showing the apoptosis of C6 cells stimulated by Pro/L and Pro/cRGDyK-L at different procaine concentrations. Pro, procaine; L, conventional liposome; cRGDyK-L, cRGDyK-modified liposome.

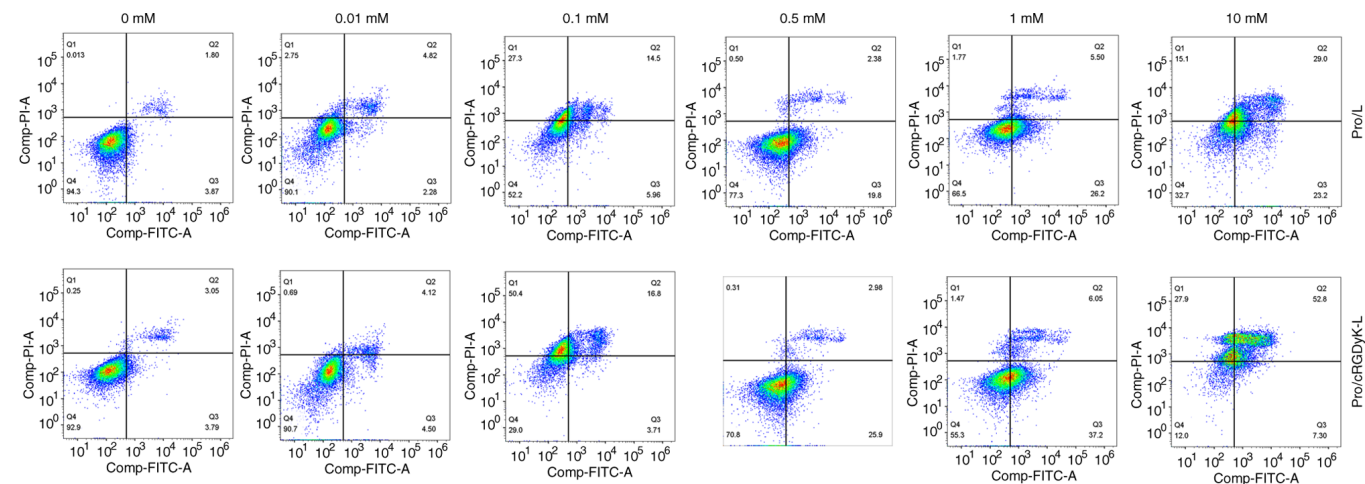

Supplement: Supplementary file 1 [file downloadSupplementary]
